# Supplementary material for: Selective colorimetric detection of Cu2+by lanthanide based hybrid complexes associated with a single crystal growth mediated transformation
Source: Royal Society of Chemistry journal article supplement (doi:10.1039/c6tc00785f), 2016-01-01
Supplement: c6tc00785f1.pdf [file c6tc00785f1.pdf]

Supplementary Information for

## Colorimetric Selective Cu<sup>2+</sup> Detection by Lanthanide based Hybrid Complexes Associated with a Single Crystal Growth Mediated Transformation

Soumyabrata Roy, Oinam Bijeta Chanu, Sumanta Sarkar and Sebastian C. Peter\*

New Chemistry Unit, Jawaharlal Nehru Centre for Advanced Scientific Research, Jakkur, Bangalore, 560064, India

**Table S1:** Selected bond lengths [Å] of the compounds **1** and **2** with estimated standard deviations in parentheses.

| <b>1: H<sub>2</sub>[Dy<sub>2</sub>(PABA)<sub>4</sub>(bpy)<sub>2</sub>(NO<sub>3</sub>)<sub>2</sub>].(bpy)<sub>2</sub>(EtOH)<sub>2</sub>(NO<sub>3</sub>)<sub>2</sub></b>                       |                      |                   |                      |
|----------------------------------------------------------------------------------------------------------------------------------------------------------------------------------------------|----------------------|-------------------|----------------------|
| <b>Bond Label</b>                                                                                                                                                                            | <b>Distances (Å)</b> | <b>Bond Label</b> | <b>Distances (Å)</b> |
| O1-Dy1                                                                                                                                                                                       | 2.386(7)             | N4-Dy1            | 2.543(8)             |
| O2-Dy1                                                                                                                                                                                       | 2.709(7)             | O2-Dy1 A          | 2.320(7)             |
| O3-Dy1                                                                                                                                                                                       | 2.335(7)             | O4-Dy1 A          | 2.302(7)             |
| O5-Dy1                                                                                                                                                                                       | 2.462(8)             | Dy1-O2 A          | 2.320(7)             |
| O6-Dy1                                                                                                                                                                                       | 2.522(7)             | Dy1-O4 A          | 2.302(7)             |
| N7-Dy1                                                                                                                                                                                       | 2.925(10)            | Dy1-Dy1 A         | 3.9241(9)            |
| N3-Dy1                                                                                                                                                                                       | 2.594(8)             |                   |                      |
| <b>2: H<sub>2</sub>[Nd<sub>2</sub>(3-nba)<sub>2</sub>(DMF)<sub>2</sub>(CH<sub>3</sub>CO<sub>2</sub>)<sub>4</sub>(H<sub>2</sub>O)<sub>2</sub>].(CH<sub>3</sub>CO<sub>2</sub>)<sub>2</sub></b> |                      |                   |                      |
| O1-Nd1                                                                                                                                                                                       | 2.422(4)             | O8-Nd1A           | 2.427(3)             |
| O2-Nd1A                                                                                                                                                                                      | 2.433(4)             | O8-Nd1            | 2.653(4)             |
| O1W-Nd1                                                                                                                                                                                      | 2.455(4)             | O11-Nd1           | 2.466(4)             |
| O3-Nd1                                                                                                                                                                                       | 2.566(4)             | Nd1-O8A           | 2.427(4)             |
| O4-Nd1                                                                                                                                                                                       | 2.511(4)             | Nd1-O2A           | 2.433(4)             |
| O7-Nd1                                                                                                                                                                                       | 2.520(4)             | Nd1-Nd1A          | 4.0767(8)            |

**Table S2.** Important stretching frequency peaks observed in the IR spectrum of compound **1**

| Compound | $\nu(\text{OH}) + \nu(\text{N-H})$ | $\nu(\text{C-H})$ | $\nu^{\text{l}}$ | $\nu(\text{N-H})_{\text{def}}$ | $\nu(\text{C}=\text{C})$ | $\nu(\text{N}=\text{O})$                    |
|----------|------------------------------------|-------------------|------------------|--------------------------------|--------------------------|---------------------------------------------|
| <b>1</b> | 3469<br>3364                       | 3072              | 1677             | 1602                           | 1602<br>1513             | 1470 <sub>asym</sub><br>1308 <sub>sym</sub> |

|  |      |  |  |      |                           |
|--|------|--|--|------|---------------------------|
|  | 3209 |  |  | 1524 | 1036 <sub>bidentate</sub> |
|--|------|--|--|------|---------------------------|

**Table S3.** The bands observed in the solid state UV spectra of the compounds **1** and **2**.

| Compound | UV bands (nm) | Assignments                                                                                   |
|----------|---------------|-----------------------------------------------------------------------------------------------|
| <b>1</b> | 290-305       | $\pi - \pi^*$ of ligand                                                                       |
|          | 370           | n- $\pi^*$ of ligand                                                                          |
|          | 760           | ${}^6\text{H}_{15/2} \rightarrow {}^6\text{F}_{3/2}$                                          |
|          | 810           | ${}^6\text{H}_{15/2} \rightarrow {}^6\text{F}_{5/2}$                                          |
|          | 912           | ${}^6\text{H}_{15/2} \rightarrow {}^6\text{F}_{7/2}$                                          |
| <b>2</b> | 250-300       | $\pi - \pi^*$ of ligand                                                                       |
|          | 348           | n- $\pi^*$ of ligand                                                                          |
|          | 470           | ${}^4\text{I}_{9/2} \rightarrow {}^4\text{G}_{11/2}, {}^2\text{G}_{9/2}, {}^2\text{K}_{15/2}$ |
|          | 520           | ${}^4\text{I}_{9/2} \rightarrow {}^4\text{G}_{7/2}, {}^3\text{K}_{13/2}$                      |
|          | 583           | ${}^4\text{I}_{9/2} \rightarrow {}^4\text{G}_{5/2}$                                           |
|          | 683           | ${}^4\text{I}_{9/2} \rightarrow {}^4\text{F}_{9/2}$                                           |
|          | 745           | ${}^4\text{I}_{9/2} \rightarrow {}^4\text{F}_{7/2}, {}^4\text{S}_{3/2}$                       |
|          | 801           | ${}^4\text{I}_{9/2} \rightarrow {}^4\text{F}_{5/2}, {}^2\text{H}_{9/2}$                       |
|          | 870           | ${}^4\text{I}_{9/2} \rightarrow {}^4\text{F}_{5/2}$                                           |

**Table S4:** Assignment of PL bands in the solid/ solution state photoluminescence spectra of **1** and **2**.

| Compound | PL bands (nm)            |                          | Assignments                                                                                              |
|----------|--------------------------|--------------------------|----------------------------------------------------------------------------------------------------------|
|          | Solid                    | EtOH solution            |                                                                                                          |
| <b>1</b> | 350-450 (centred at 394) | 300-400 (centred at 350) | L→M charge transfer band, Ligand radiative relaxation                                                    |
|          | 479                      | 479                      | ${}^4\text{F}_{9/2} \rightarrow {}^6\text{H}_{15/2}$                                                     |
|          | 572                      | 571                      | ${}^4\text{F}_{9/2} \rightarrow {}^6\text{H}_{13/2}$                                                     |
|          | 750                      | 703                      | ${}^4\text{F}_{9/2} \rightarrow {}^6\text{H}_{9/2} / {}^4\text{I}_{15/2} \rightarrow {}^6\text{H}_{9/2}$ |
| <b>2</b> | 350-450                  |                          | L→M charge transfer band, Ligand radiative relaxation                                                    |

**Table S5:** ICP-OES analysis of metal exchange studies of **1** and **2**.

| No                         | Sample      | Salt                              | Conc         | Analyte       | Cation 1 (ppm) | Cation 2 (ppm)            | Cation 3 (ppm) |
|----------------------------|-------------|-----------------------------------|--------------|---------------|----------------|---------------------------|----------------|
| A                          | <b>1-Dy</b> | Cu(NO <sub>3</sub> ) <sub>2</sub> | 0.5 M        | Supernatant   | Cu - Saturated | Dy- 54                    | None           |
| B                          |             |                                   |              | Crystals      | Cu - 19        | Dy- 4                     | None           |
| C                          |             | CuSO <sub>4</sub>                 | 0.5 M        | Crystals      | Cu - 57        | Dy-6                      | None           |
| D                          |             |                                   |              | Supernatant   | Cu - Saturated | Dy-69                     | None           |
| E                          |             | AgNO <sub>3</sub>                 | 0.5 M        | Crystals      | Dy - 1         | Ag-6                      | None           |
| F                          |             |                                   |              | Supernatant   | Dy - 30        | Ag-3000                   | None           |
| G                          |             | CuCl <sub>2</sub>                 | 0.5 M        | Crystals      | Cu - 47        | Dy-0.6                    | None           |
| H                          |             |                                   |              | Supernatant   | Cu - Saturated | Dy-48                     | None           |
| I                          | <b>2-Nd</b> | Cu(NO <sub>3</sub> ) <sub>2</sub> | 0.5 M        | Crystals      | Cu - 90        | Nd-8                      | None           |
| J                          |             |                                   |              | Supernatant   | Cu - Saturated | Nd-170                    | None           |
| K                          |             | CuSO <sub>4</sub>                 | 0.5 M        | Crystals      | Cu - 49        | Nd-4                      | None           |
| L                          |             |                                   |              | Supernatant   | Cu - Saturated | Nd-91                     | None           |
| M                          |             | CuCl <sub>2</sub>                 | 0.5 M        | Crystals      | Cu - 87        | Nd-5                      | None           |
| N                          |             |                                   |              | Supernatant   | Cu - Saturated | Nd-145                    | None           |
| <b>Mixed Solvent Study</b> |             |                                   |              |               |                |                           |                |
| P                          | <b>2-Nd</b> | Cu, Ni, Co, Zn, Au, Cd            | ~ 0.1 M each | Crystals      | Cu -18         | Nd-44                     | None           |
| Q                          |             |                                   |              | Supernatant-a | Nd -72         | All other cations present |                |
| R                          |             |                                   |              | Supernatant-b | Nd -54         | All other cations present |                |
| T                          | <b>1-Dy</b> | Cu, Ni, Co, Zn, Au, Cd            | ~ 0.1 M each | Crystals      | Cu -4          | Dy-13                     | Au-5           |
| U                          |             |                                   |              | Supernatant-a | Dy -12         | All other cations present |                |
| V                          |             |                                   |              | Supernatant-b | Dy -3          | All other cations present |                |

**Table S6.** Crystal data and structure refinement for **2\_Cu exchanged**: C<sub>28</sub>H<sub>32</sub>Cu<sub>2</sub>N<sub>4</sub>O<sub>24</sub> at 100 K.

|                                              |                                                                                                                                       |
|----------------------------------------------|---------------------------------------------------------------------------------------------------------------------------------------|
| Empirical formula                            | C <sub>28</sub> H <sub>32</sub> Cu <sub>2</sub> N <sub>4</sub> O <sub>24</sub>                                                        |
| Formula weight                               | 935.65                                                                                                                                |
| Temperature                                  | 100(2) K                                                                                                                              |
| Wavelength                                   | 0.71073 Å                                                                                                                             |
| Crystal system                               | Monoclinic                                                                                                                            |
| Space group                                  | <i>P</i> 21/ <i>c</i>                                                                                                                 |
| Unit cell dimensions                         | $a = 17.3672(15)$ Å, $\alpha = 90^\circ$<br>$b = 7.1242(6)$ Å, $\beta = 101.285(5)^\circ$<br>$c = 14.5591(13)$ Å, $\gamma = 90^\circ$ |
| Volume                                       | 1766.5(3) Å <sup>3</sup>                                                                                                              |
| <i>Z</i>                                     | 2                                                                                                                                     |
| Density (calculated)                         | 1.759 g/cm <sup>3</sup>                                                                                                               |
| Absorption coefficient                       | 1.309 mm <sup>-1</sup>                                                                                                                |
| F(000)                                       | 956                                                                                                                                   |
| Crystal size                                 | 0.140 x 0.050 x 0.040 mm <sup>3</sup>                                                                                                 |
| $\theta$ range for data collection           | 2.853 to 24.997°                                                                                                                      |
| Index ranges                                 | -20 ≤ <i>h</i> ≤ 20, 0 ≤ <i>k</i> ≤ 8, 0 ≤ <i>l</i> ≤ 17                                                                              |
| Reflections collected                        | 3011                                                                                                                                  |
| Independent reflections                      | 3011                                                                                                                                  |
| Completeness to $\theta = 24.997^\circ$      | 97.2%                                                                                                                                 |
| Refinement method                            | Full-matrix least-squares on F <sup>2</sup>                                                                                           |
| Data / restraints / parameters               | 3011 / 277 / 288                                                                                                                      |
| Goodness-of-fit                              | 1.073                                                                                                                                 |
| Final R indices [ <i>I</i> > 2σ( <i>I</i> )] | R <sub>obs</sub> = 0.0623, wR <sub>obs</sub> = 0.1544                                                                                 |
| R indices [all data]                         | R <sub>all</sub> = 0.1013, wR <sub>all</sub> = 0.1795                                                                                 |
| Extinction coefficient                       | 0.0039(11)                                                                                                                            |
| Largest diff. peak and hole                  | 1.511 and -0.709 e <sup>-</sup> Å <sup>-3</sup>                                                                                       |

$R = \sum ||F_o| - |F_c|| / \sum |F_o|$ ,  $wR = \{ \sum [w(|F_o|^2 - |F_c|^2)^2] / \sum [w(|F_o|^4)] \}^{1/2}$  and  $w = 1 / [\sigma^2(F_o^2) + (0.0729P)^2 + 15.6912P]$  where  $P = (F_o^2 + 2F_c^2) / 3$

**Table S7:** Study of the detection limit of Cu<sup>2+</sup> (CuCl<sub>2</sub>) detection by 2

| Sample         | Salt              | Concentration      | Analyte  | Cu (ppm)  | Nd (ppm)  |
|----------------|-------------------|--------------------|----------|-----------|-----------|
| 2 (Nd crystal) | CuCl <sub>2</sub> | 10 <sup>-1</sup> M | Crystal  | Saturated | 150       |
|                |                   |                    | Solution | Saturated | Saturated |
|                |                   | 10 <sup>-2</sup> M | Crystal  | 40        | Saturated |
|                |                   |                    | Solution | Saturated | 250       |
|                |                   | 10 <sup>-3</sup> M | Crystal  | 5         | Saturated |
|                |                   |                    | Solution | 106       | 200       |
|                |                   | 10 <sup>-4</sup> M | Crystal  | 3         | Saturated |
|                |                   |                    | Solution | 10        | 140       |
|                |                   | 10 <sup>-5</sup> M | Crystal  | 1.9       | Saturated |
|                |                   |                    | Solution | 2         | 150       |

## Figures

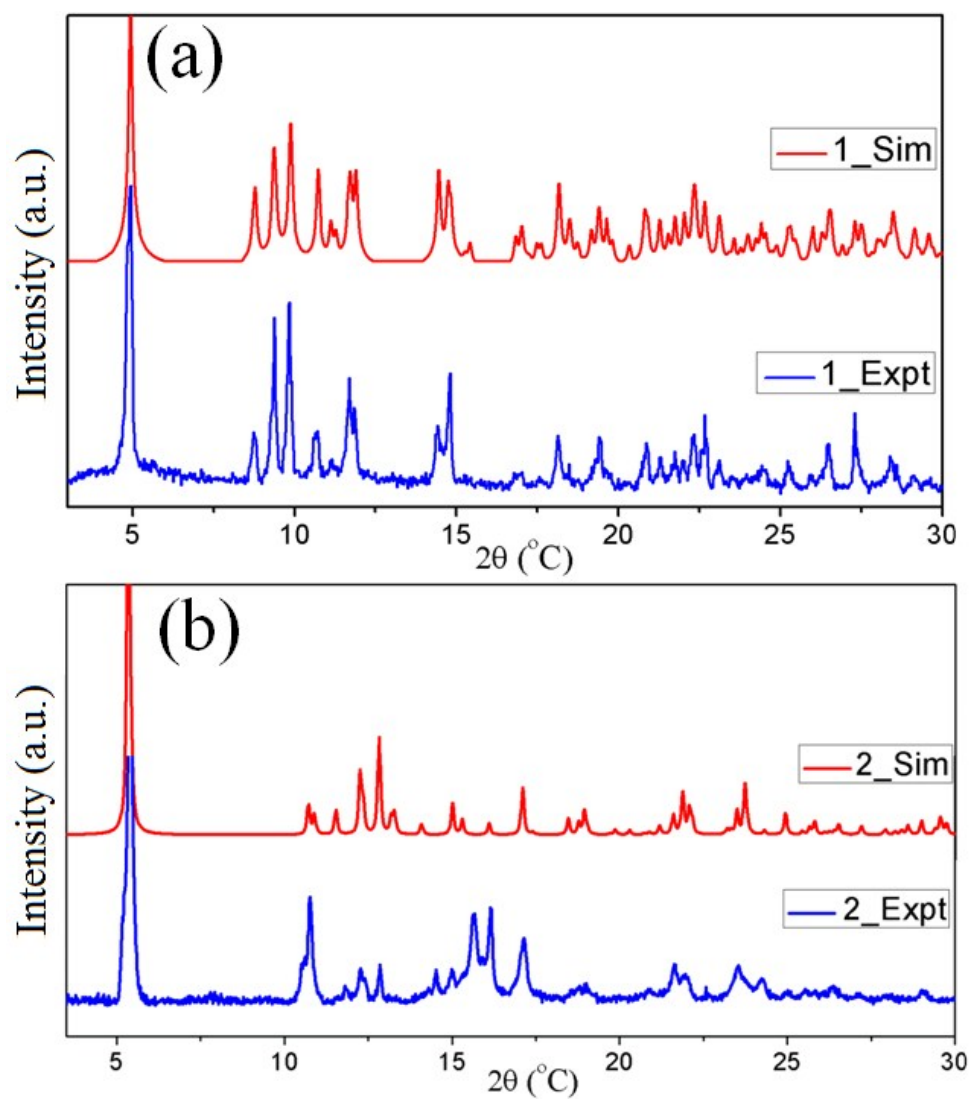

**Figure S1.** Comparison of experimental and simulated PXRD patterns of the bulk samples of (a) 1 and (b) 2

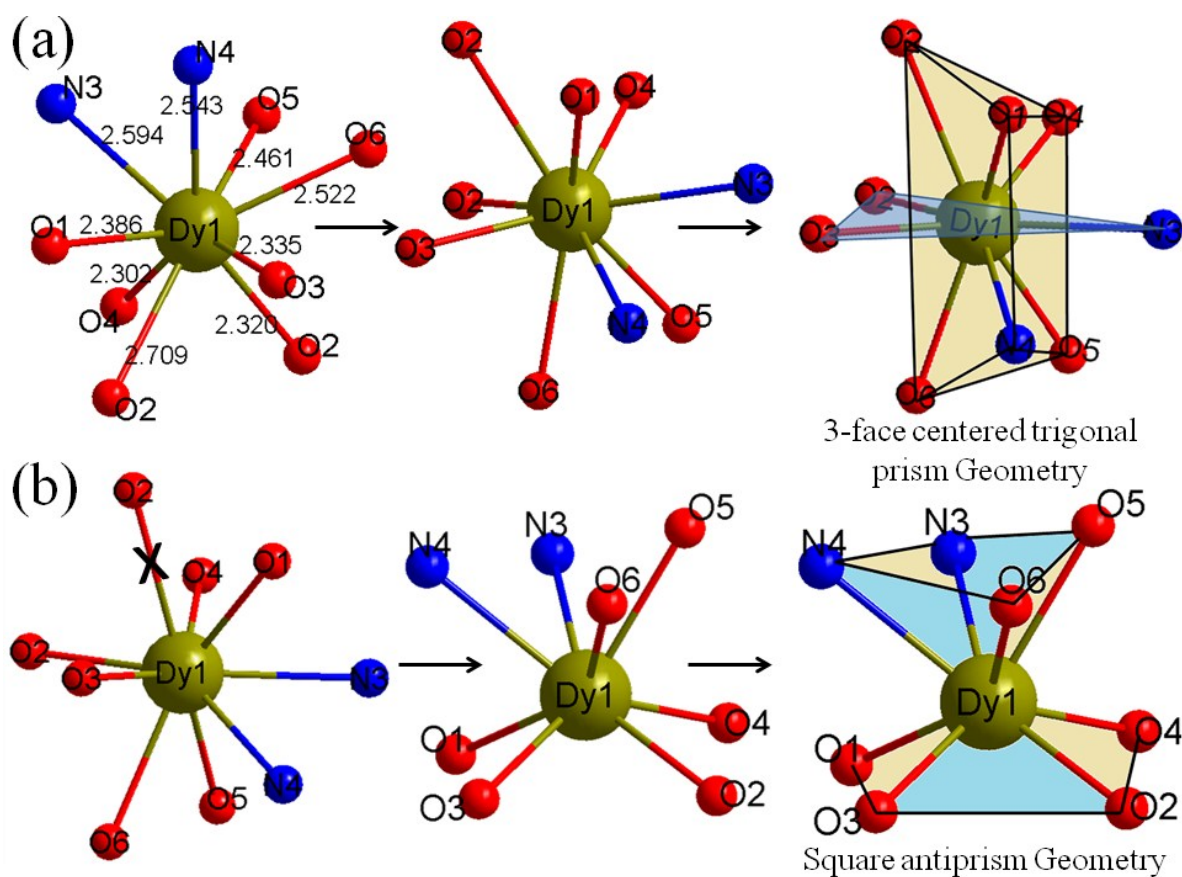

**Figure S2.** Coordination geometry of Dy in the compound **1**. (a) 3-face centred Trigonal prism geometry when 9 coordinating oxygens are considered and (b) Square antiprism geometry of **1** considering 8 coordinating oxygens (removing O2: bond distance 2.71 Å)

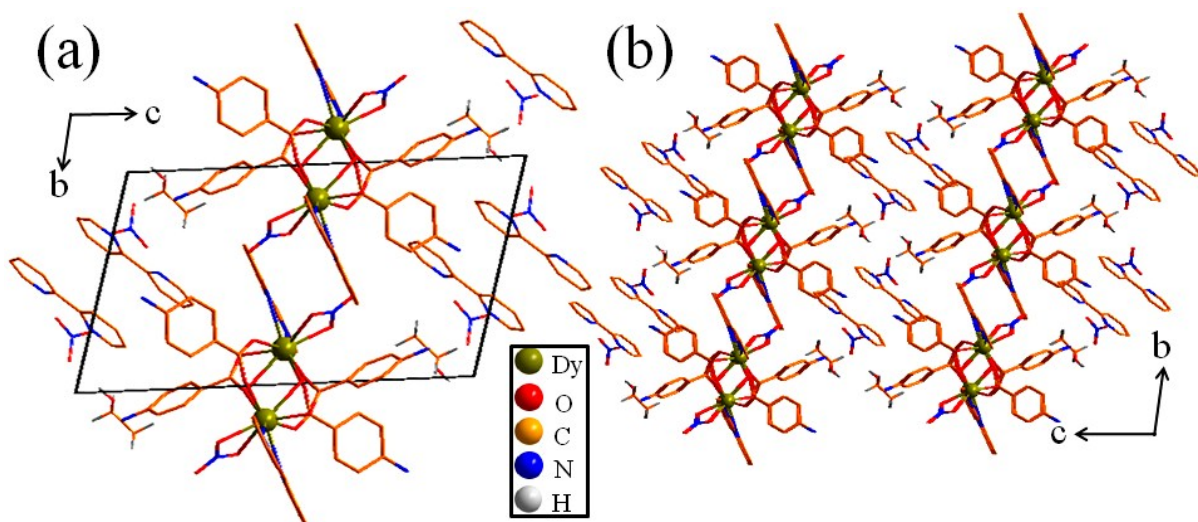

**Figure S3.** (a) Unit cell and (b) super cell of **1**.

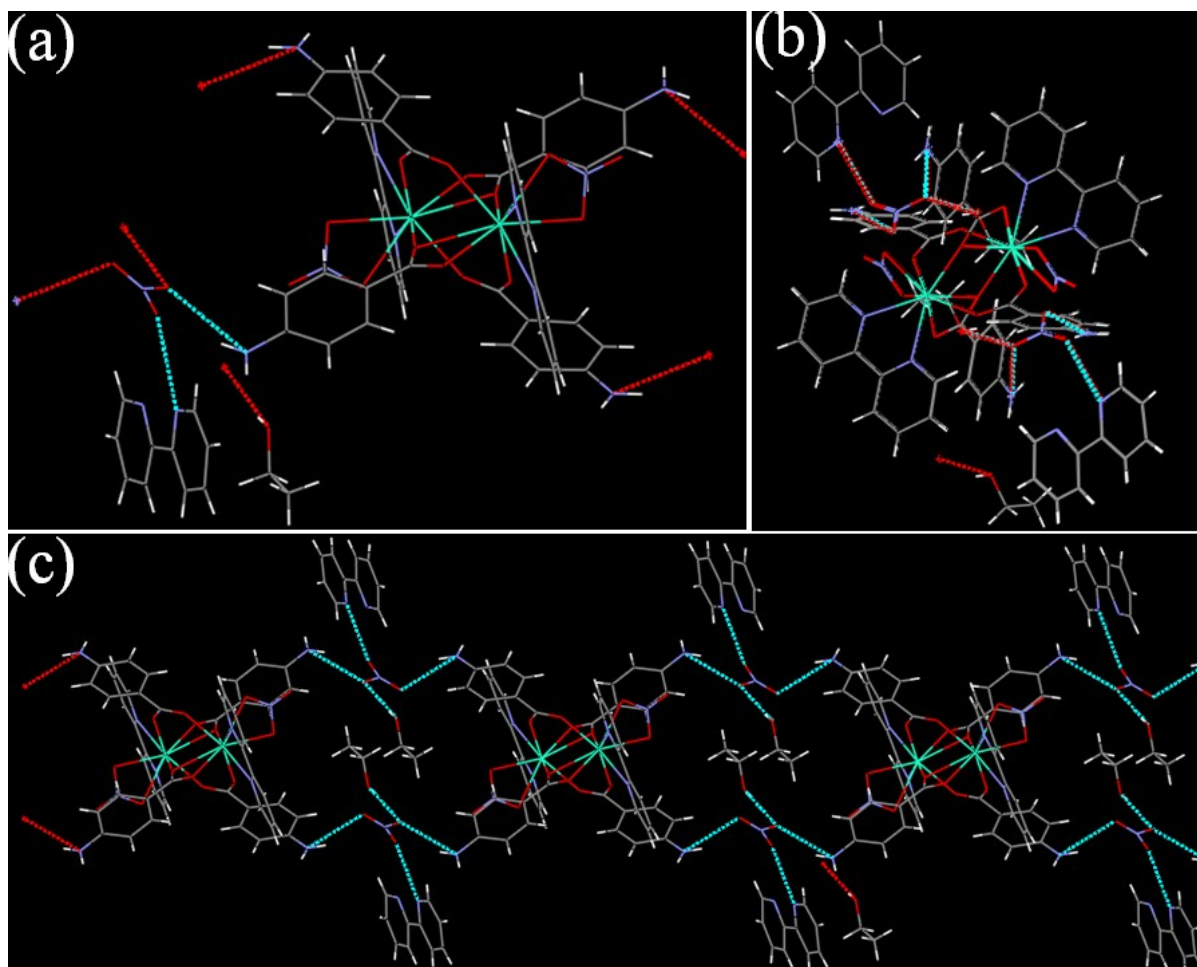

**Figure S4.** Hydrogen bonding in compound **1**.(a) and (b) H-bonding/ C-H O interactions shown as red dashed lines in the dinuclear unit of **1** and (c) 2D crystal growth due to H-bonding/ C-H O interactions in **1**.



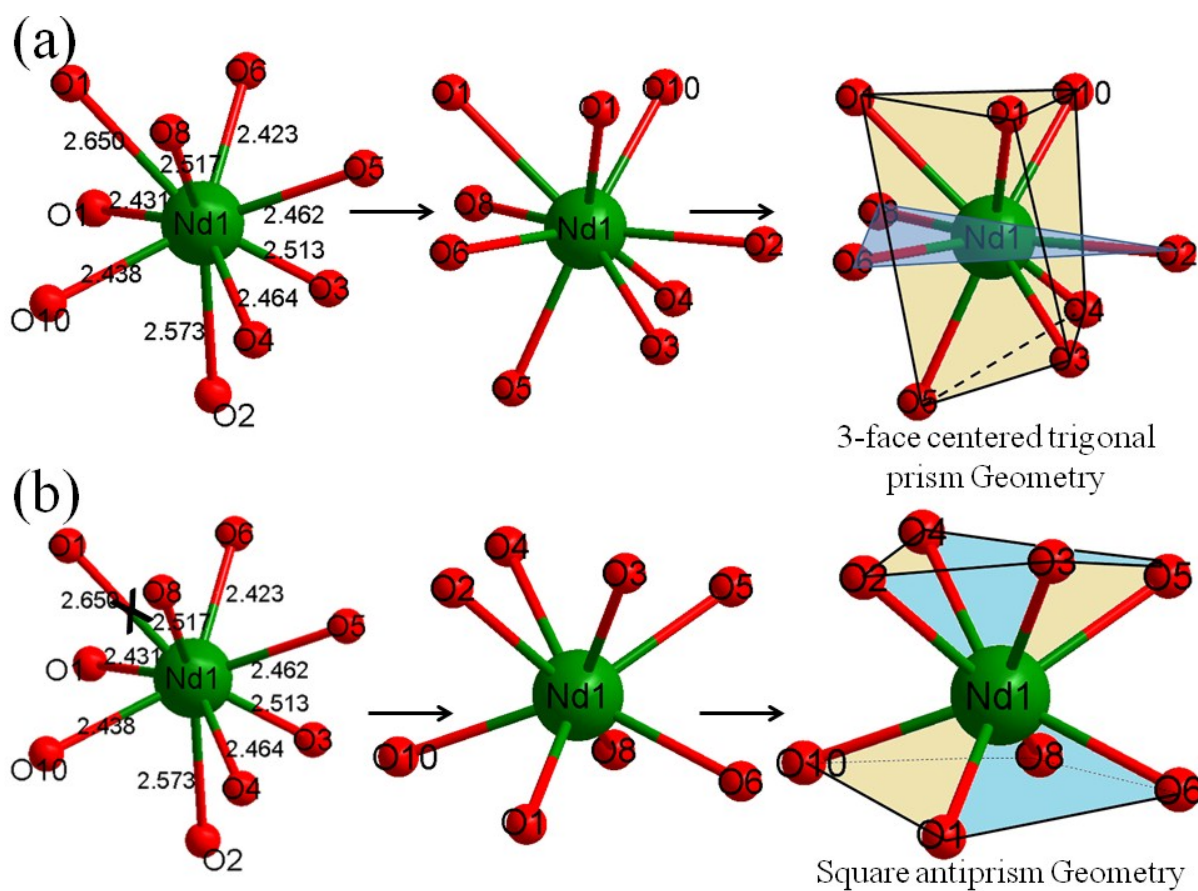

**Figure S5.** Coordination geometry of Nd in **2**. (a) 3-face centred Trigonal prism geometry of Nd centre when 9 coordinating oxygens are considered and (b) Square antiprism geometry of Nd centre considering 8 coordinating oxygens (removing O1: bond distance 2.66 Å)

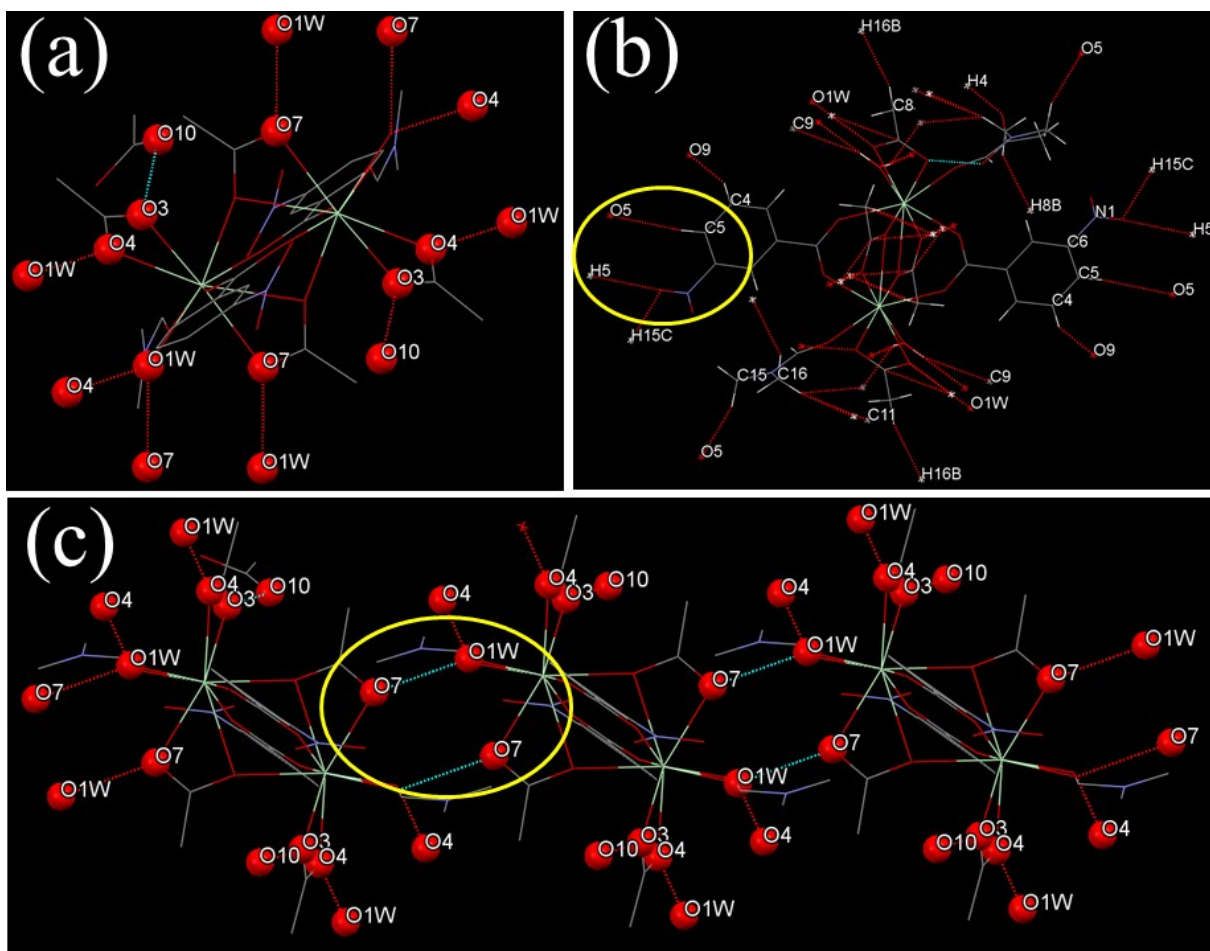

**Figure S6.** Hydrogen bonding and C-H...O interactions in compound 2 (a) H-bonding shown as red dashed lines in dinuclear unit of 2, (b) C-H...O interactions in 2. (c) H-bonding shown as dashed red line (also highlighted in yellow circle) in a chain of dinuclear units of 2 .

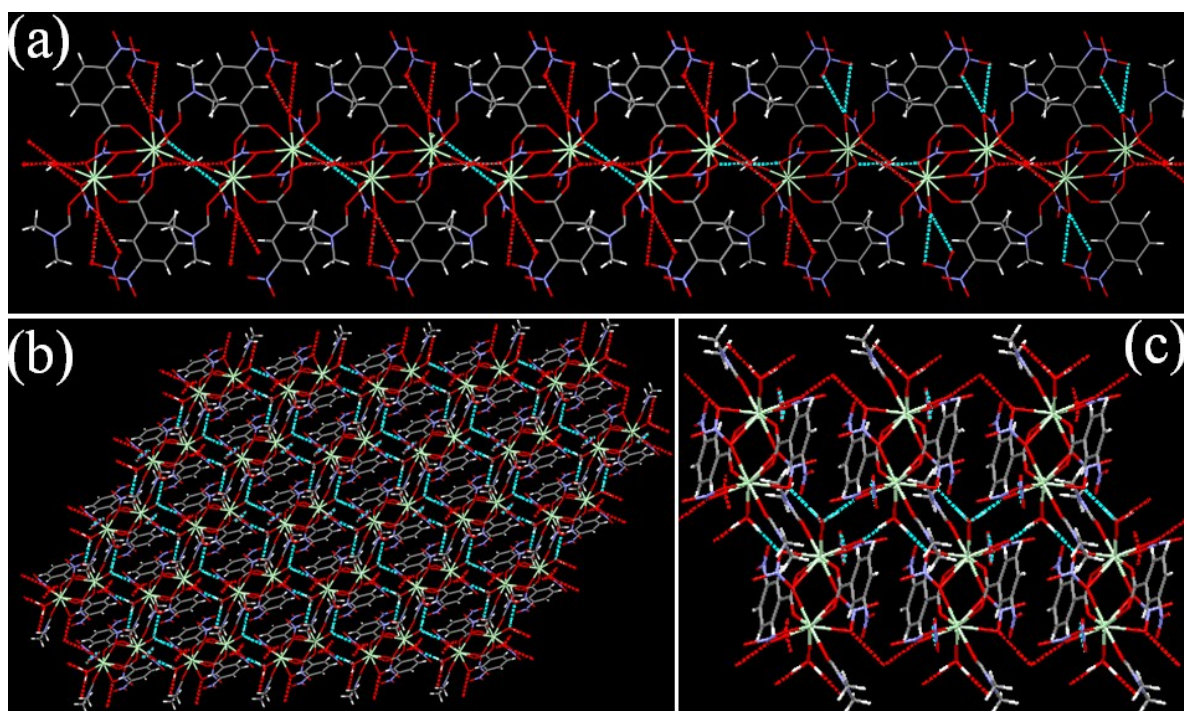

**Figure S7.** Hydrogen bonding and C-H-O interactions in the crystal packing of compound **2** (a), (b) and (c) showing growth of the crystal structure along various directions arising from H-bonding and C-H O interactions.

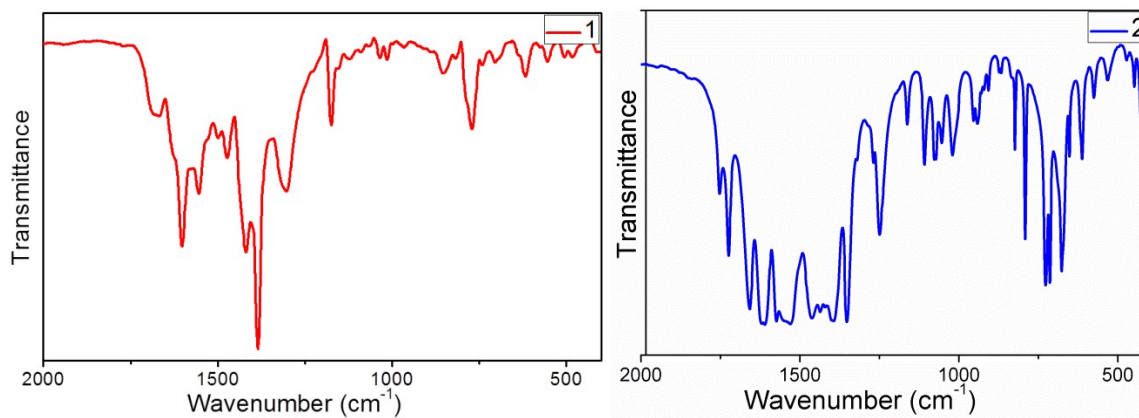

**Figure S8.** IR spectra of 1 (left) and 2 (right). The spectra shows all the stretching frequencies in the two compounds corresponding to the organic moieties present in the respective structures.

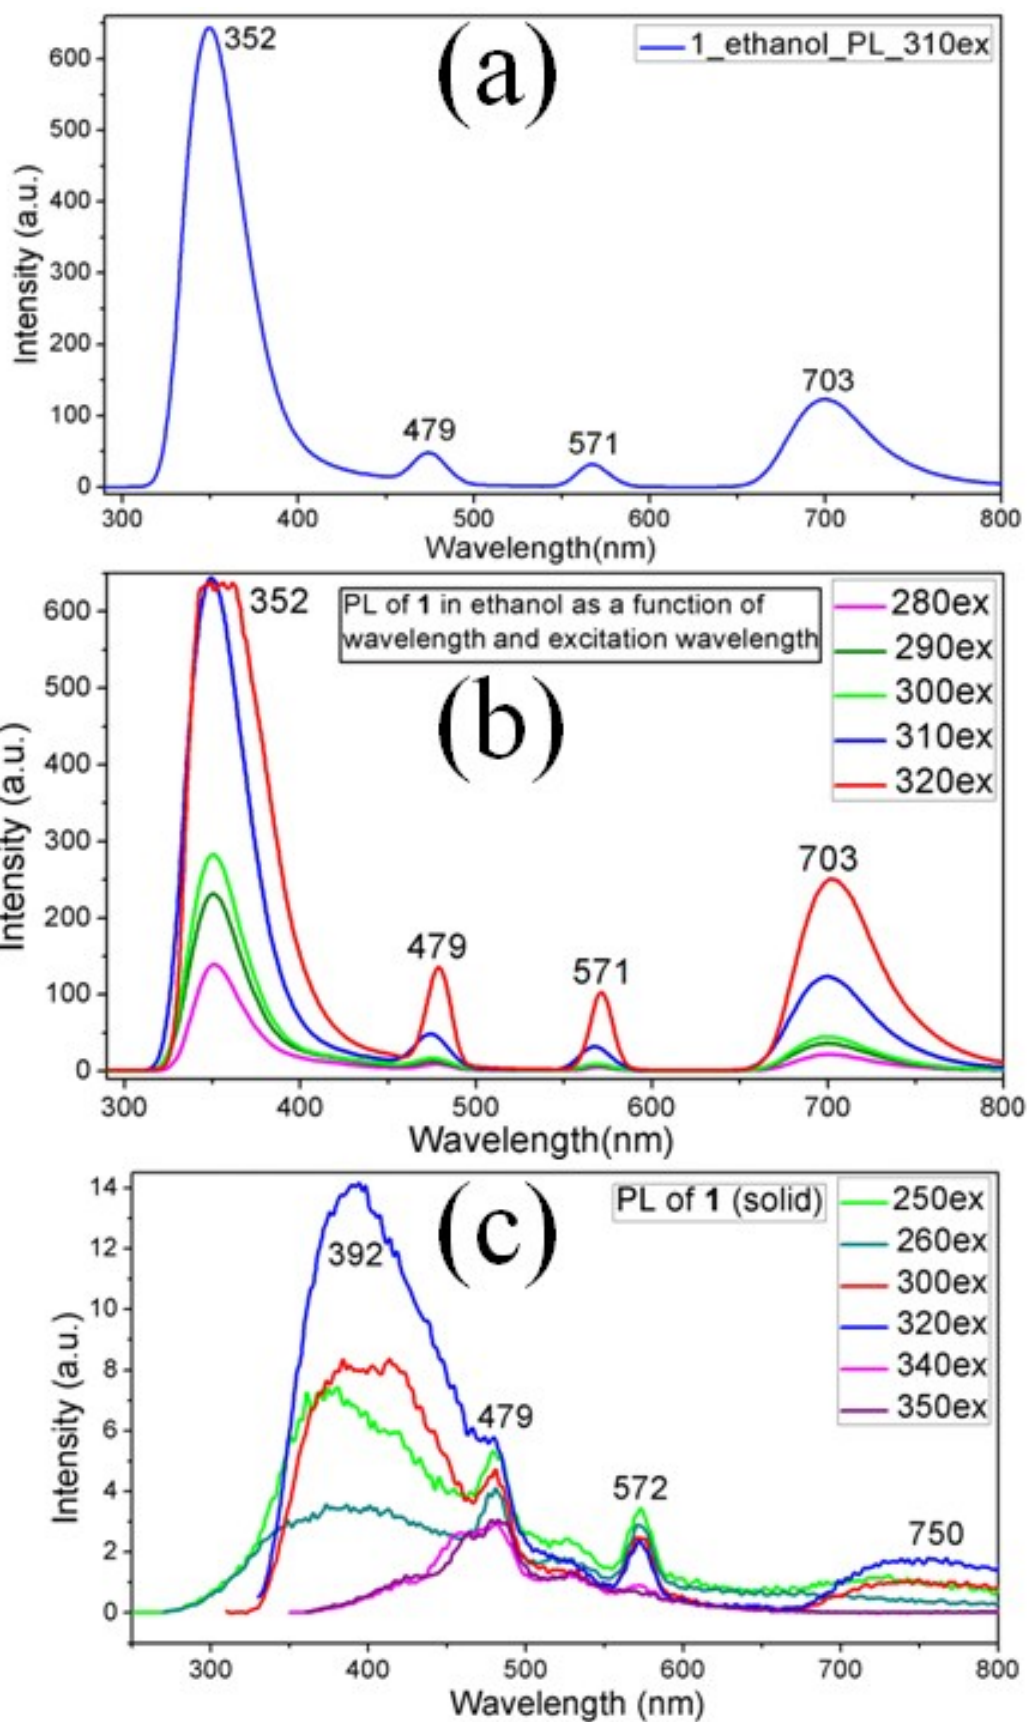

**Figure S9.** PL of 1. (a) PL in ethanol, (b) PL of 1 in ethanol as a function of wavelength and (c) PL of 1 (solid).

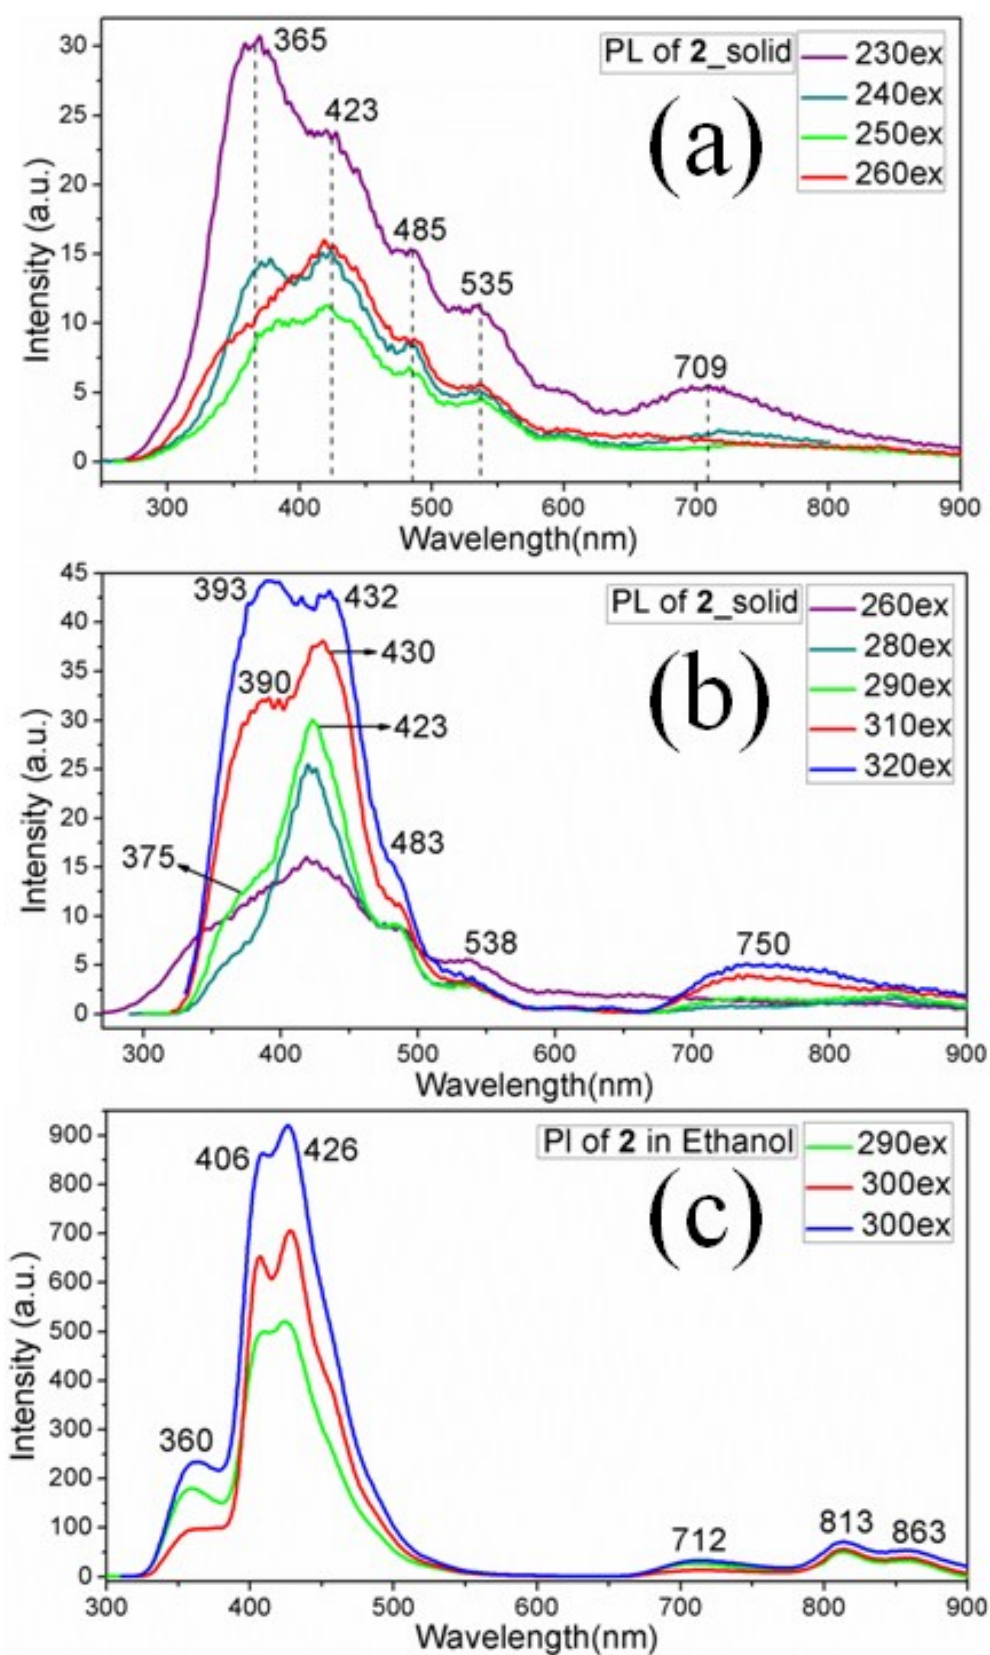

**Figure S10.** PL of 2. (a) PL of 2 (solid) as a function of wavelength, (b) PL of 2 (solid) as a function of wavelength and (c) PL of 2 in ethanol as a function of wavelength.

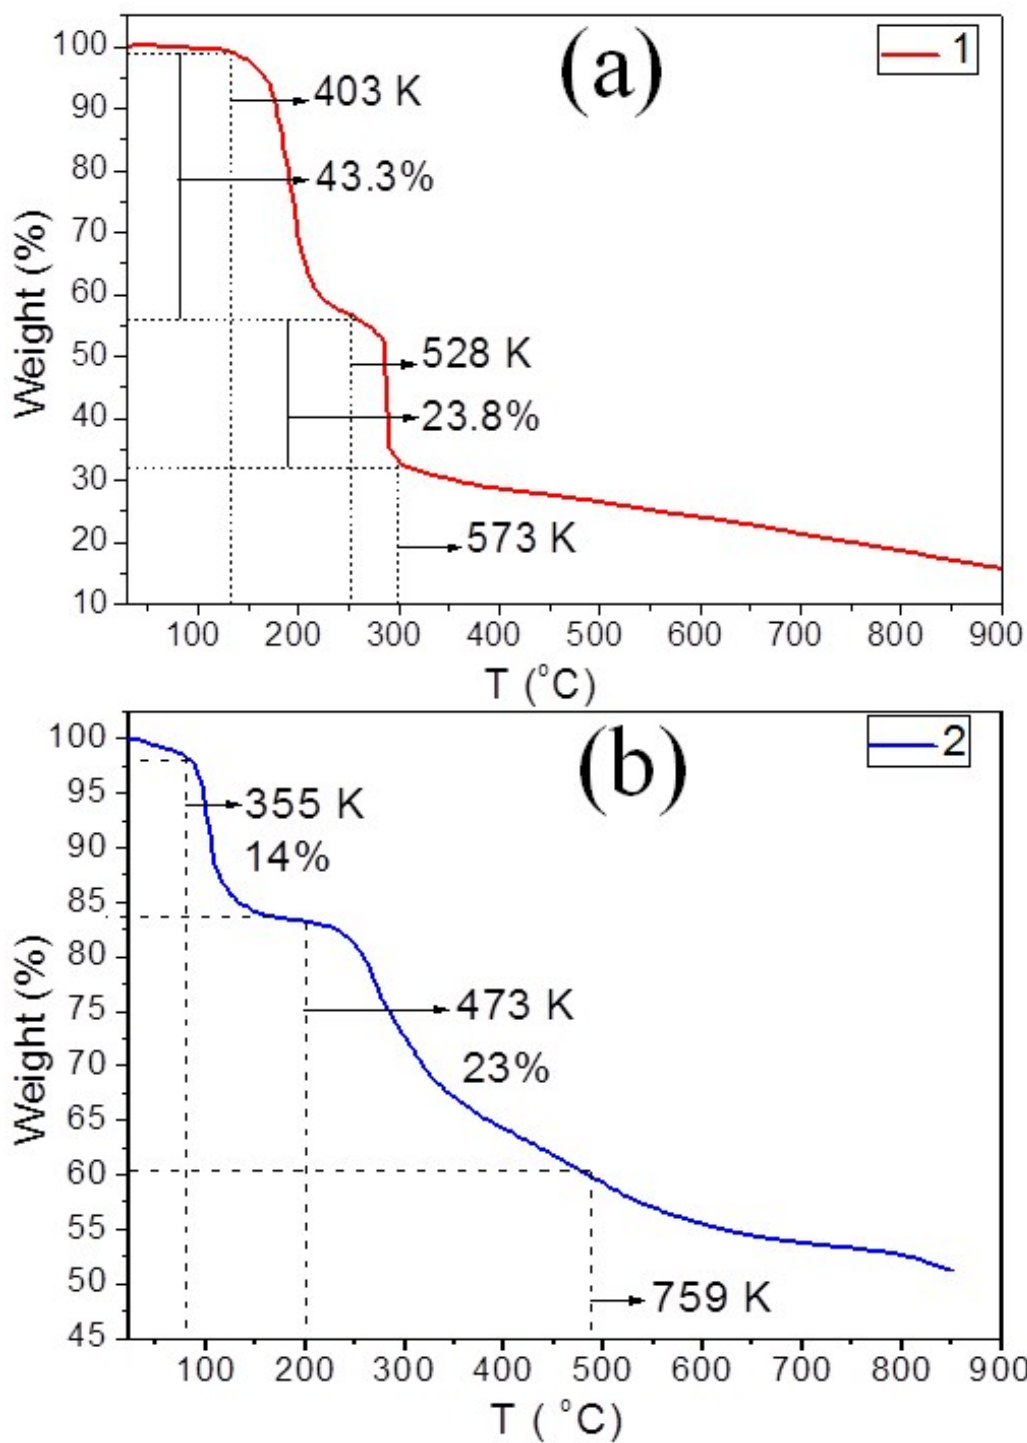

**Figure S11.** Thermogravimetric plot of the compounds **1** (a) and **2** (b). The weight loss percentages at various temperatures are marked.

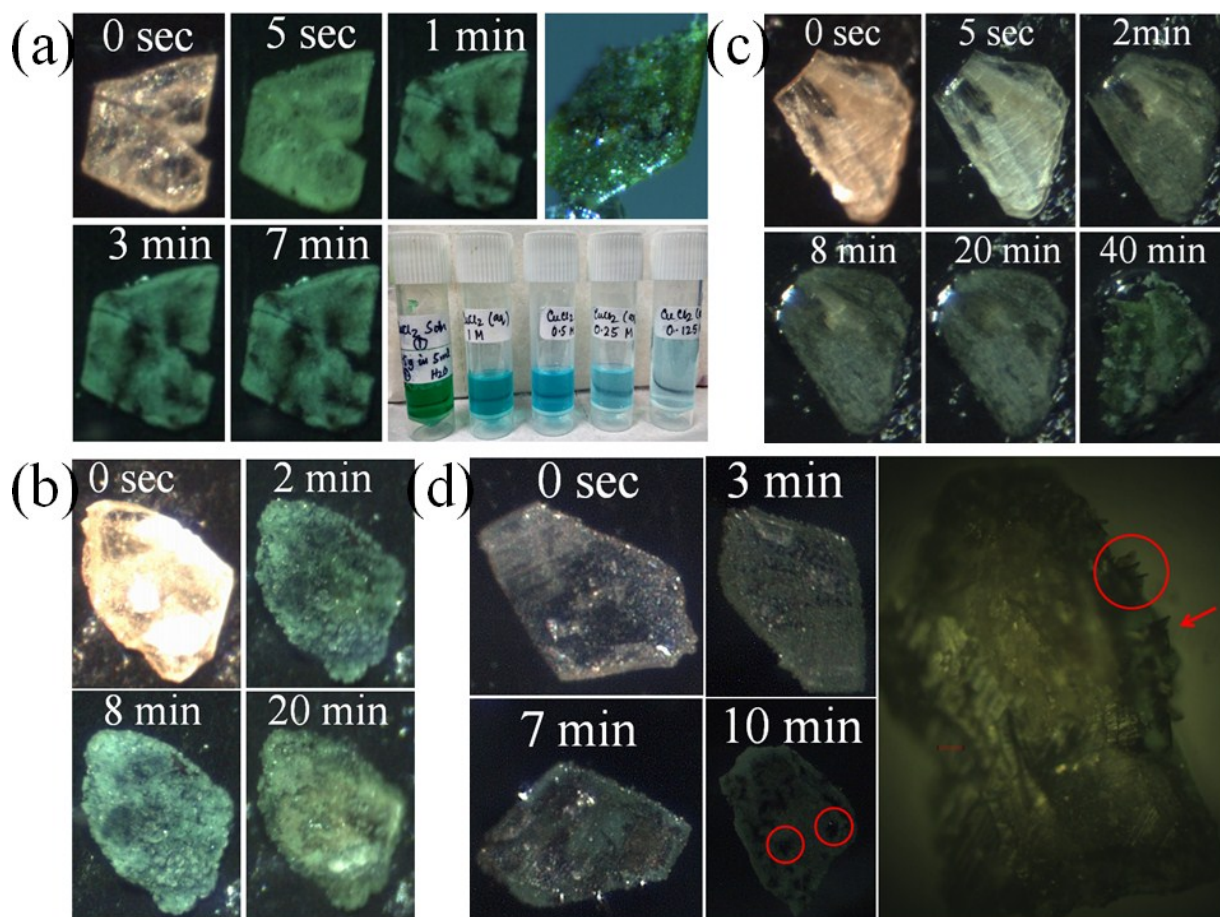

**Figure S12.**  $\text{Cu}^{2+}$  sensing study on single crystals of Compound **1** at different concentrations of  $\text{CuCl}_2$ . (a) In 2 M  $\text{CuCl}_2$ , (b) Compound **1** in 1 M  $\text{CuCl}_2$ , (c) Compound **1** in 0.5 M and (d) Compound **1** in 0.25 M  $\text{CuCl}_2$ .

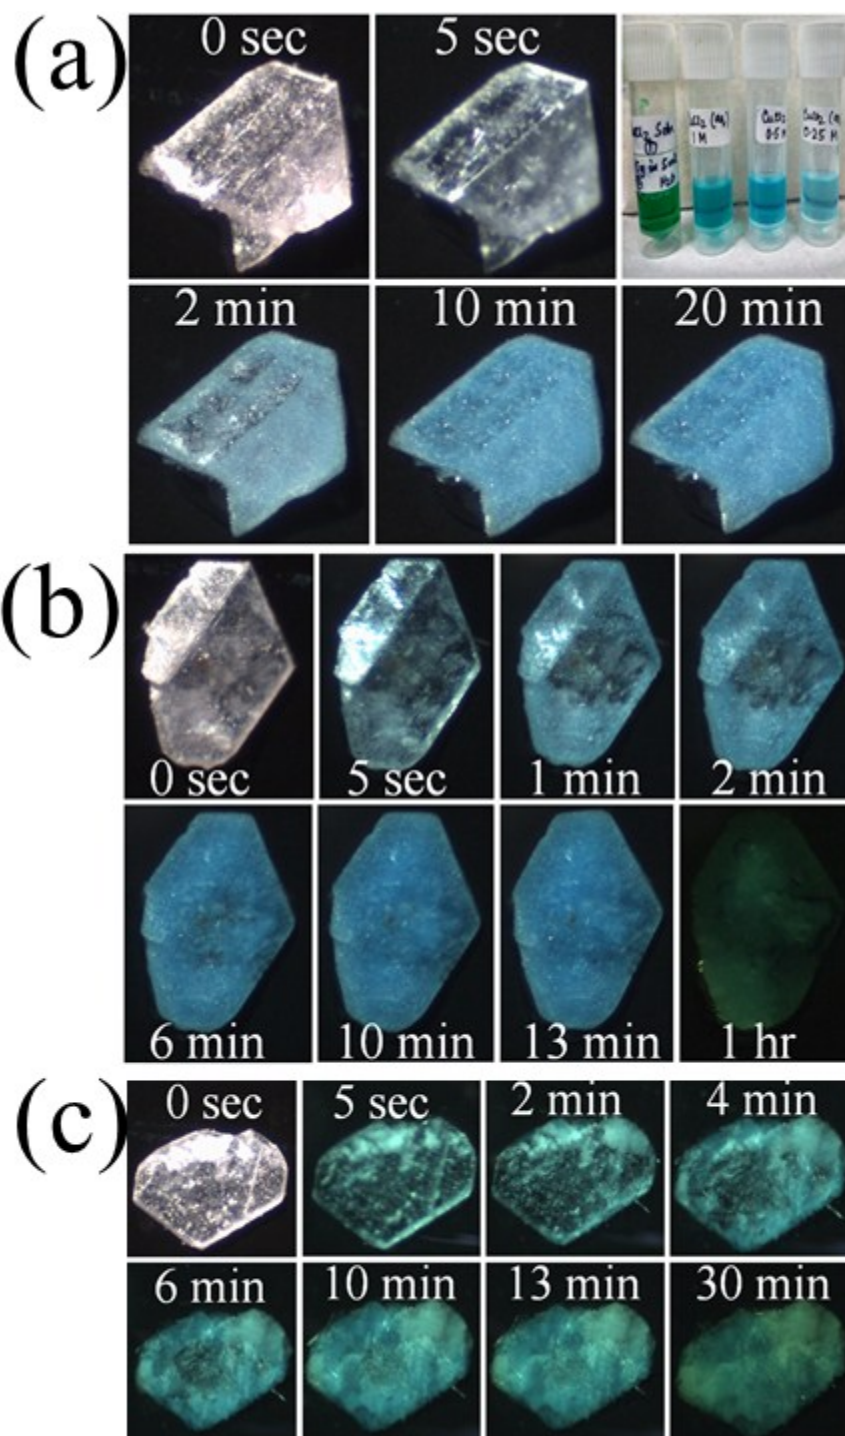

**Figure S13.**  $\text{Cu}^{2+}$  sensing study on single crystals of Compound **2** at different concentrations of  $\text{CuCl}_2$ . (a) Compound **2** in 0.5 M  $\text{CuCl}_2$ , (b) Compound **2** in 1 M  $\text{CuCl}_2$  and (c) Compound **2** in 2 M  $\text{CuCl}_2$ .



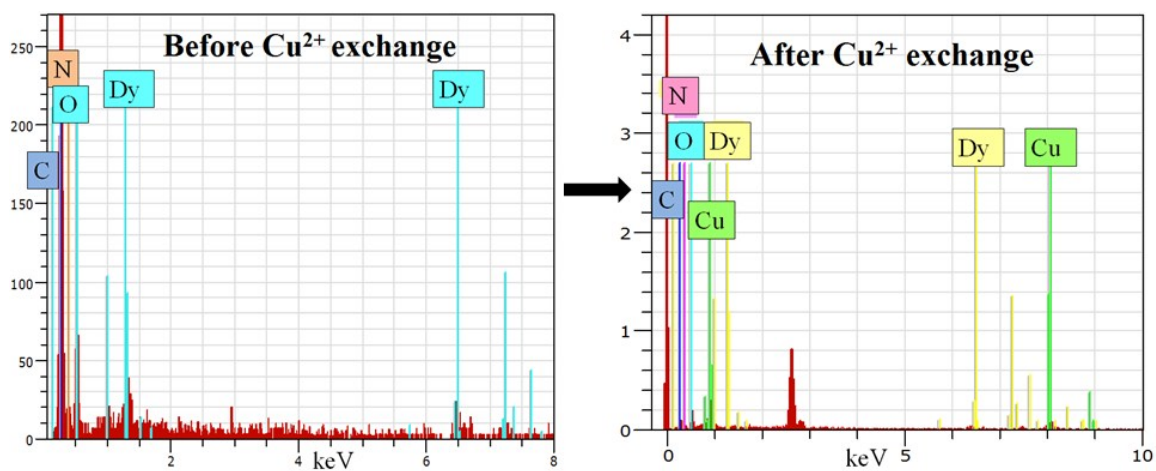

| Elements | Before Cu <sup>2+</sup> exchange (At %) | After Cu <sup>2+</sup> exchange (At %) |
|----------|-----------------------------------------|----------------------------------------|
| C        | 65.35                                   | 52.54                                  |
| Dy       | 2.48                                    | 0.89                                   |
| O        | 20.82                                   | 17.67                                  |
| N        | 11.34                                   | 7.24                                   |
| Cu       | 0.00                                    | 21.65                                  |
| Cl       | 0.00                                    | 0.00                                   |

| Elements | Before Cu <sup>2+</sup> exchange (At %) | After Cu <sup>2+</sup> exchange (At %) |
|----------|-----------------------------------------|----------------------------------------|
| Dy       | 100.0                                   | 1.07                                   |
| Cu       | 0.00                                    | 98.93                                  |

**Figure S14.** EDS of **1** before (left) and after (right) Cu<sup>2+</sup> exchange along the compositions obtained shown in tables below.

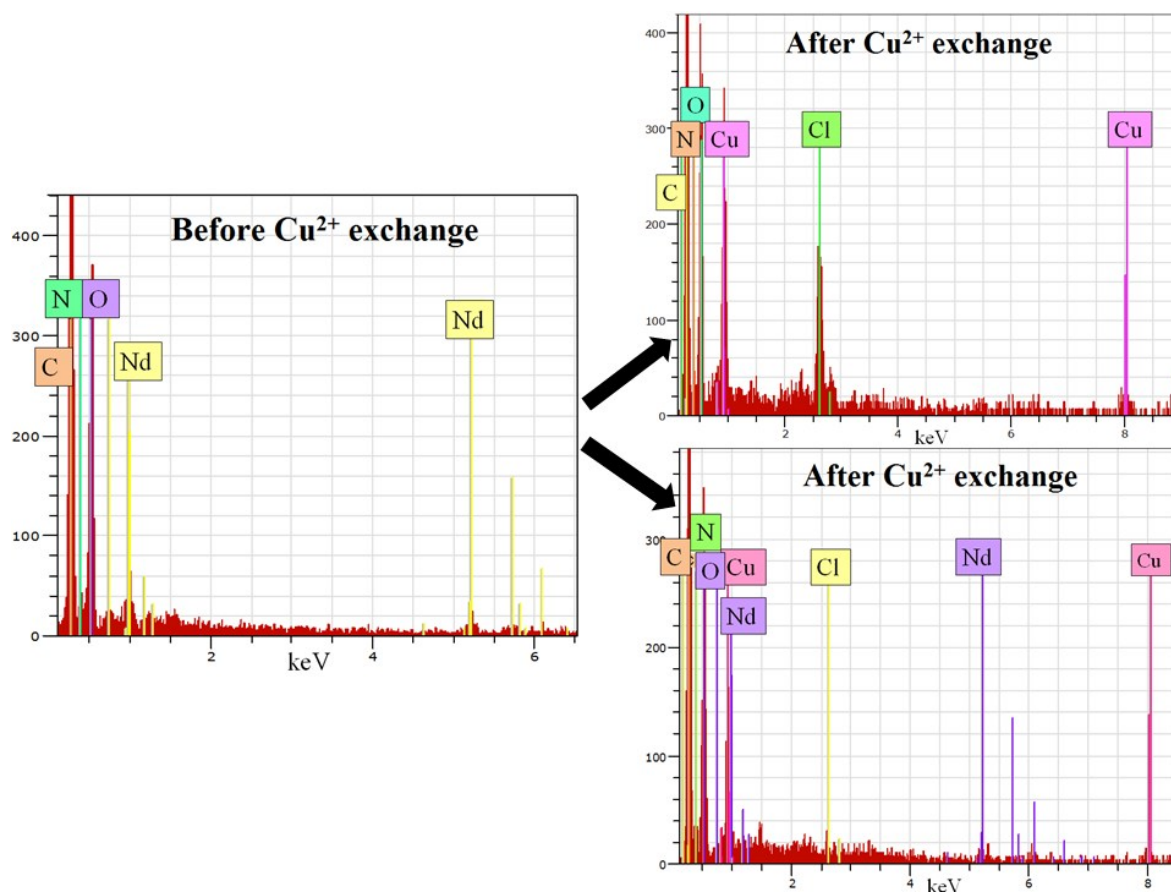

| Elements | Before Cu <sup>2+</sup> exchange (At %) | After Cu <sup>2+</sup> exchange (At %) |
|----------|-----------------------------------------|----------------------------------------|
| C        | 49.50                                   | 61.49                                  |
| Nd       | 1.97                                    | 0.00                                   |
| O        | 37.66                                   | 18.44                                  |
| N        | 10.86                                   | 4.00                                   |
| Cu       | 0.00                                    | 16.00                                  |
| Cl       | 0.00                                    | 0.07                                   |

| Elements | Before Cu <sup>2+</sup> exchange (At %) | After Cu <sup>2+</sup> exchange (At %) |
|----------|-----------------------------------------|----------------------------------------|
| Nd       | 100.0                                   | 0                                      |
| Cu       | 0.00                                    | 100.0                                  |

**Figure S15.** EDS of 2 before (left) and after (right) Cu<sup>2+</sup> exchange along the compositions obtained shown in tables below.

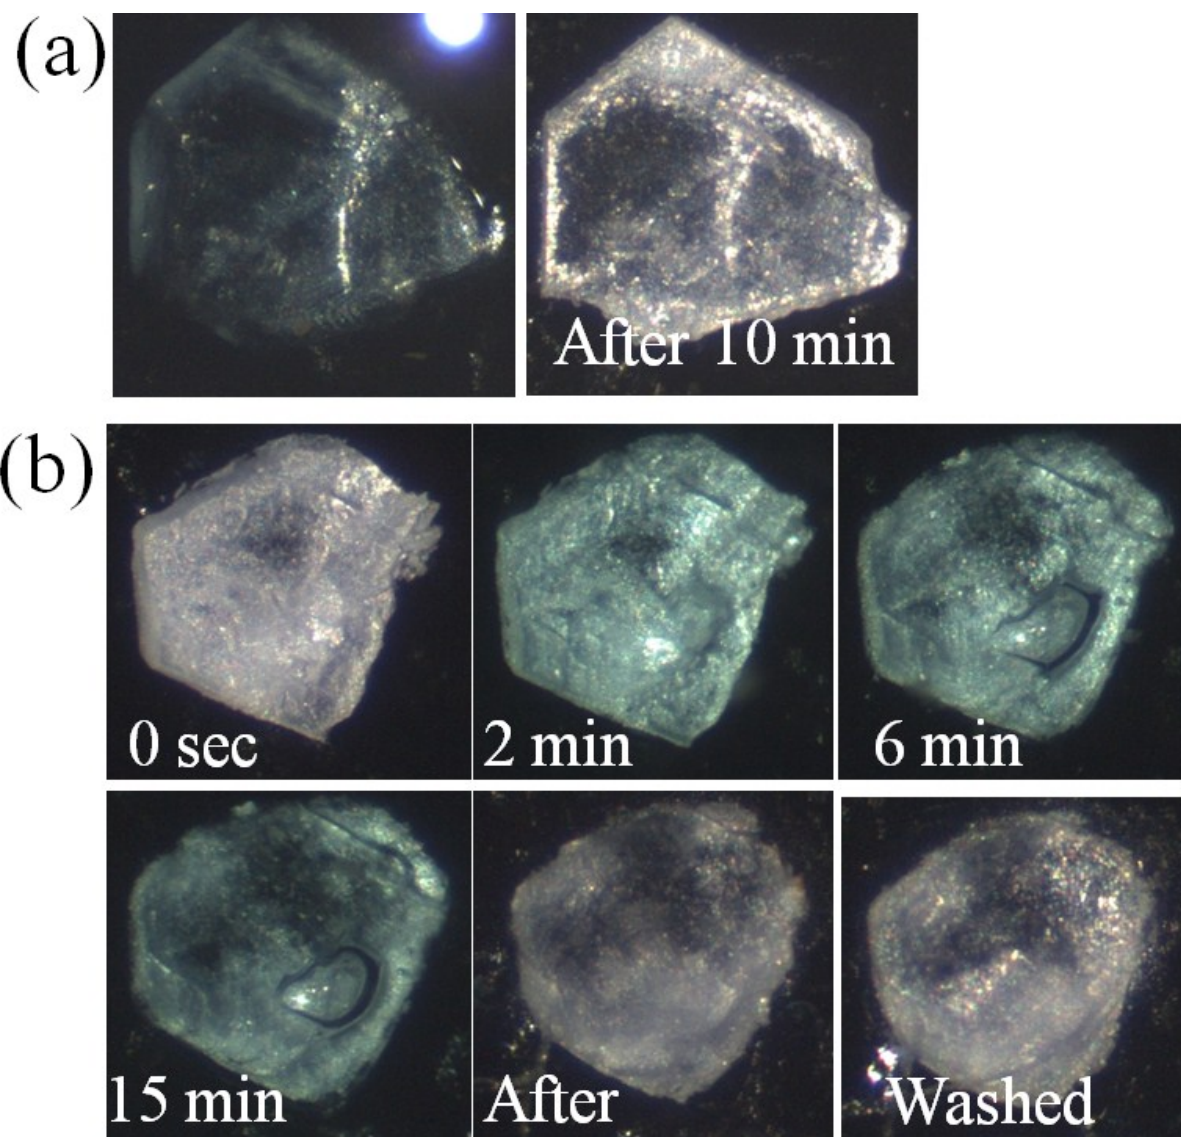

**Figure S16.** Ni<sup>2+</sup> exchange studies on **2**. (a) Compound **2** in 0.5 M NiCl<sub>2</sub> at different intervals of time and (b) Compound **2** in 1 M NiCl<sub>2</sub> at different intervals of time.

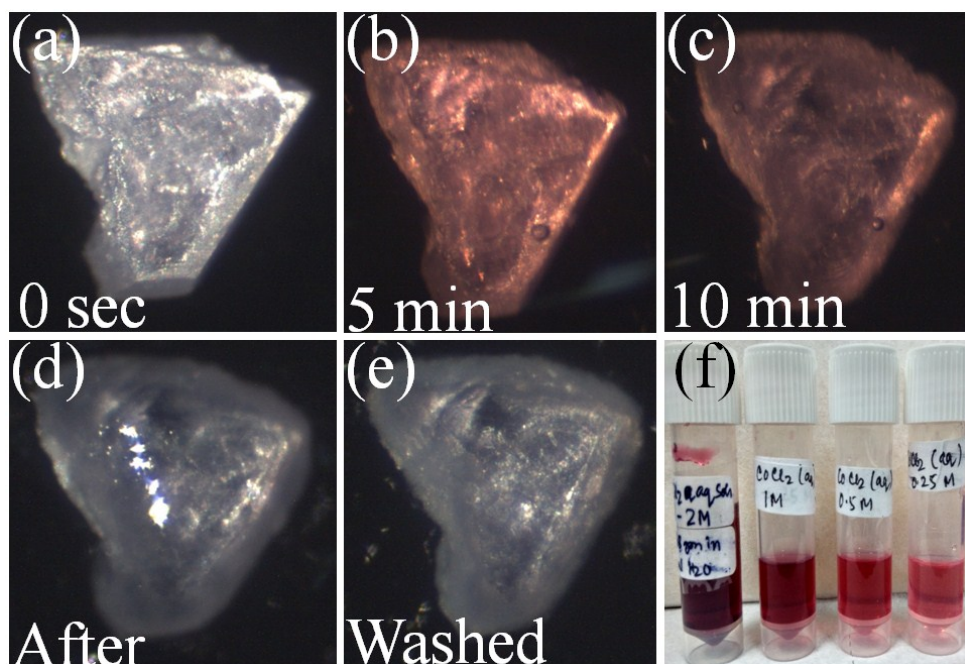

**Figure S17.** Compound **2** in 1 M  $\text{CoCl}_2$  after various intervals of time. (a) Pristine crystal of **2**. The red colour that is seen in (b) and (c) are of the solution, as the crystals are inside the red solution of  $\text{CoCl}_2$ , (d) Crystal after being taken out of the solution and (e) Crystal after being thoroughly washed with water.

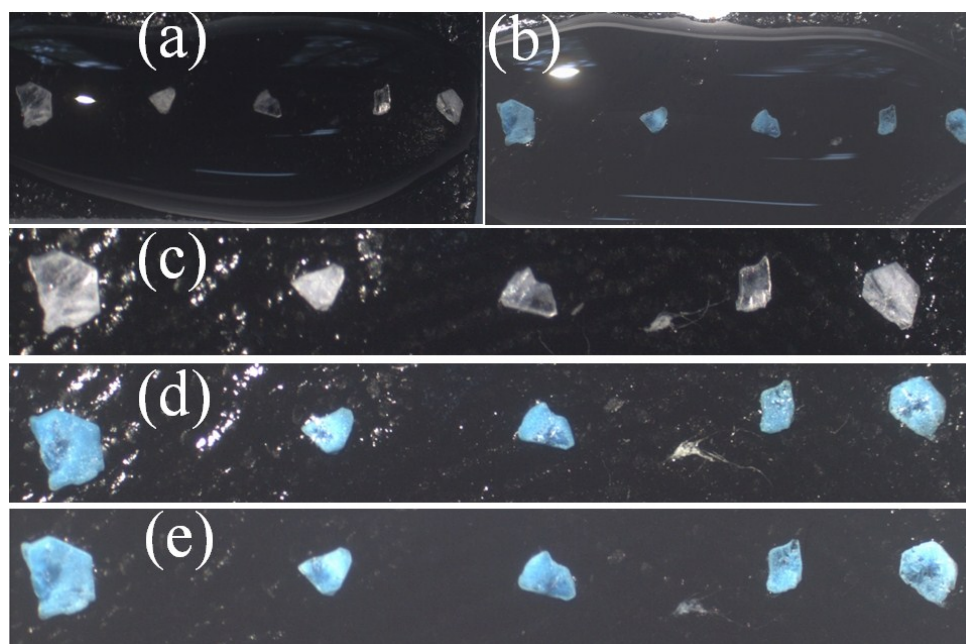

**Figure S18.** Compound **2** in Solution of mixed salts (0.5 m of each of  $\text{CuCl}_2$ ,  $\text{CoCl}_2$ ,  $\text{NiCl}_2$ ). (a) Immediately after addition of the solution, (b) After 5 mins, (c) Pristine crystals of **2**, (d) After 10 mins, (e) After washing thoroughly with deionized water.

#### Reference

1. X.-W. Lei, G.-H. Zhong, L.-H. Li, C.-L. Hu, M.-J. Li and J.-G. Mao, *Inorg. Chem.*, 2009, **48**, 2526-2533.
